# Supplementary material for: Depressed Parents' Treatment Needs and Children's Problems in an Urban Family Medicine Practice
Source: Atypon-hosted journal article supplement (doi:10.1176/ps.62.3.pss6203_0317), 2011-03-01
Supplement: Vidair_ds.pdf [file Vidair_ds.pdf]

**Table A (Online Appendix).****Demographics and Current Diagnoses of Parents Attending an Urban Family Medicine Practice**

| Demographics                                                        | n <sup>a</sup>  | %         |
|---------------------------------------------------------------------|-----------------|-----------|
| % Female                                                            | 237 (87)        | 87        |
| Marital status                                                      |                 |           |
| Married/cohabiting                                                  | 97 (36)         | 36        |
| Separated/divorced                                                  | 84 (31)         | 31        |
| Widowed                                                             | 9 (3)           | 3         |
| Never married                                                       | 81 (30)         | 30        |
| Race/ethnicity                                                      |                 |           |
| Hispanic                                                            | 231 (85)        | 85        |
| Non-Hispanic black                                                  | 36 (13)         | 13        |
| Non-Hispanic white                                                  | 2 (1)           | 1         |
| Asian/Pacific Islander/Other                                        | 4 (2)           | 2         |
| Education                                                           |                 |           |
| ≤ 8 <sup>th</sup> grade                                             | 29 (11)         | 11        |
| 9 <sup>th</sup> -11 <sup>th</sup> grade                             | 59 (22)         | 22        |
| High-school graduate                                                | 69 (25)         | 25        |
| Some college or technical school                                    | 81 (30)         | 30        |
| ≥ 4 years of college                                                | 33 (12)         | 12        |
| Annual household income                                             |                 |           |
| < \$6,000                                                           | 79 (29)         | 29        |
| \$6,000-\$11,999                                                    | 73 (27)         | 27        |
| \$12,000-\$17,999                                                   | 55 (20)         | 20        |
| \$18,000-\$35,999                                                   | 49 (18)         | 18        |
| ≥ \$36,000                                                          | 15 (6)          | 6         |
| Insurance <sup>b</sup>                                              |                 |           |
| Medicare                                                            | 30 (11)         | 11        |
| Medicaid                                                            | 180 (69)        | 69        |
| Other government program                                            | 35 (13)         | 13        |
| Private insurance                                                   | 18 (7)          | 7         |
| Self-pay/Other                                                      | 45 (17)         | 17        |
| Current diagnosis                                                   |                 |           |
| Major depressive disorder (MDD)                                     | 24 (9)          | 9         |
| Subthreshold depression <sup>c</sup>                                | 63 (23)         | 23        |
| <b>Any depression</b>                                               | <b>87 (32)</b>  | <b>32</b> |
| Panic disorder                                                      | 15 (6)          | 6         |
| Generalized anxiety disorder                                        | 15 (6)          | 6         |
| Social anxiety disorder                                             | 33 (12)         | 12        |
| <b>Any anxiety disorder<sup>d</sup></b>                             | <b>47 (17)</b>  | <b>17</b> |
| Alcohol use disorder                                                | 16 (6)          | 6         |
| Drug use disorder                                                   | 10 (4)          | 4         |
| <b>Any substance use disorder<sup>d</sup></b>                       | <b>22 (8)</b>   | <b>8</b>  |
| <b>Any disorder (including subthreshold depression)<sup>d</sup></b> | <b>107 (39)</b> | <b>39</b> |

<sup>a</sup>Number range is 271-273 due to missing data.

<sup>b</sup>Participants asked to check all that apply.

<sup>c</sup>Subthreshold depression = 2-4 depressive symptoms, including depressed mood or anhedonia, present on more than half the days or nearly every day in the past two weeks, or >5 MDD symptoms present at least several days in the past two weeks, including depressed mood or anhedonia.

<sup>d</sup>Participants may meet criteria for >1 of these disorders.



**Table B (Online Appendix).**  
**Interest in Help for Problems By Parental Depression Status in an Urban Family Medicine Practice**

| Problems                                            | Major depression<br>(n = 24) <sup>a</sup> |    | Subthreshold depression<br>(n = 63) <sup>b</sup> |    | No depression<br>(n = 186) <sup>c</sup> |    | Major depression v.<br>Subthreshold depression |          | Combined Major/Subthreshold<br>depression v. No depression |                   |
|-----------------------------------------------------|-------------------------------------------|----|--------------------------------------------------|----|-----------------------------------------|----|------------------------------------------------|----------|------------------------------------------------------------|-------------------|
|                                                     | n                                         | %  | n                                                | %  | n                                       | %  | OR <sup>d</sup>                                | CI       | OR <sup>d</sup>                                            | CI                |
| Feeling nervous/anxious <sup>e</sup>                | 16                                        | 67 | 46                                               | 74 | 40 <sup>f</sup>                         | 22 | .53                                            | .17-1.68 | <b>6.51</b>                                                | <b>3.43-12.35</b> |
| Sadness/feeling down/little interest <sup>e</sup>   | 18                                        | 75 | 48                                               | 77 | 48 <sup>f</sup>                         | 26 | .94                                            | .27-3.26 | <b>6.24</b>                                                | <b>3.26-11.94</b> |
| Bodily complaints <sup>e</sup>                      |                                           |    | 49                                               | 78 | 63 <sup>f</sup>                         | 34 | 1.76                                           | .42-7.40 | <b>6.66</b>                                                | <b>3.37-13.15</b> |
| Getting along with people close to you <sup>e</sup> | 12                                        | 50 | 26                                               | 42 | 32 <sup>f</sup>                         | 17 | 1.59                                           | .57-4.47 | <b>3.81</b>                                                | <b>1.99-7.31</b>  |
| Work stress <sup>e</sup>                            | 8                                         | 35 | 20                                               | 32 | 26 <sup>f</sup>                         | 14 | 1.63                                           | .53-5.04 | <b>3.35</b>                                                | <b>1.65- 6.79</b> |
| Life changes <sup>e</sup>                           | 9                                         | 39 | 30                                               | 48 | 44 <sup>f</sup>                         | 24 | .76                                            | .26-2.29 | 1.78                                                       | .94-3.35          |
| Finding new job <sup>e</sup>                        | 13                                        | 57 | 29                                               | 47 | 43 <sup>f</sup>                         | 23 | 1.69                                           | .56-5.15 | <b>2.05</b>                                                | <b>1.08-3.87</b>  |
| Financial problems <sup>e</sup>                     | 17                                        | 74 | 43                                               | 68 | 83 <sup>f</sup>                         | 45 | 1.19                                           | .37-3.79 | <b>2.75</b>                                                | <b>1.46-5.21</b>  |
| Death of someone close to you <sup>e</sup>          | 14                                        | 58 | 23                                               | 38 | 38 <sup>f</sup>                         | 20 | 1.75                                           | .62-4.96 | <b>3.19</b>                                                | <b>1.66-6.12</b>  |
| Feeling bored/lonely <sup>e</sup>                   | 15                                        | 63 | 36                                               | 58 | 30 <sup>f</sup>                         | 16 | 1.13                                           | .40-3.26 | <b>5.84</b>                                                | <b>3.06-11.12</b> |
| Overusing alcohol/drugs <sup>e</sup>                | 1                                         | 4  | 6                                                | 10 | 4                                       | 2  | .45                                            | .05-4.45 | <b>4.19</b>                                                | <b>1.05-16.69</b> |

<sup>a</sup> Number range is 23-24 due to missing data.

<sup>b</sup> Subthreshold depression was identified if 2-4 depressive symptoms, including depressed mood or anhedonia, were present on more than half the days or nearly every day in the past two weeks, or if >5 major depression symptoms were present at least several days in the past two weeks, including depressed mood or anhedonia. Number range is 60-63 due to missing data.

<sup>c</sup> No depression = not meeting criteria for major depression or subthreshold depression. Number range is 184-186 due to missing data.

<sup>d</sup> Odds ratios (OR) are adjusted for parental age and any anxiety disorder.

<sup>e</sup> Chi square comparisons across groups were significant at the  $p < .05$  level.

<sup>f</sup> Pairwise comparisons were conducted between the combined major/subthreshold depression groups and the no depression group and were significant at the  $p < .01$  level.

---

---

**Table C (Online Appendix).**

**Parental Reports of Children's Problems and Interest in Help for Children By Parental Depression Status in an Urban Family Medicine Practice**

|                                                                               | Major depression<br>(n =24) <sup>a</sup> |    | Subthreshold<br>Depression<br>(n =63) <sup>b</sup> |    | No Depression<br>(n =186) <sup>c</sup> |    | Major depression v.<br>Subthreshold depression |            | Combined Major/Subthreshold<br>depression v. No depression |                  |
|-------------------------------------------------------------------------------|------------------------------------------|----|----------------------------------------------------|----|----------------------------------------|----|------------------------------------------------|------------|------------------------------------------------------------|------------------|
|                                                                               | n                                        | %  | n                                                  | %  | n                                      | %  | OR <sup>d</sup>                                | CI         | OR <sup>d</sup>                                            | CI               |
| <b>Children's problems</b>                                                    |                                          |    |                                                    |    |                                        |    |                                                |            |                                                            |                  |
| Often feels nervous/worried <sup>e</sup>                                      | 6                                        | 25 | 14                                                 | 22 | 18 <sup>f</sup>                        | 10 | 1.98                                           | .56-7.05   | <b>3.23</b>                                                | <b>1.48-7.06</b> |
| Often unhappy/has little interest <sup>e</sup>                                | 7                                        | 29 | 19                                                 | 30 | 28 <sup>f</sup>                        | 15 | 1.42                                           | .45-4.50   | 2.34                                                       | .52-2.12         |
| Does not have friends <sup>e</sup>                                            | 8                                        | 33 | 12                                                 | 19 | 25                                     | 14 | 2.63                                           | .77-8.94   | <b>2.47</b>                                                | <b>1.19-5.15</b> |
| Disobeys rules at home <sup>e</sup>                                           | 9                                        | 38 | 25                                                 | 40 | 41 <sup>f</sup>                        | 22 | 1.05                                           | .36-3.08   | <b>2.99</b>                                                | <b>1.58-5.68</b> |
| Inattention <sup>e</sup>                                                      | 9                                        | 38 | 26                                                 | 41 | 43 <sup>f</sup>                        | 24 | 1.31                                           | .45-3.87   | <b>2.25</b>                                                | <b>1.19-4.22</b> |
| Often loses temper <sup>e</sup>                                               | 6                                        | 25 | 28                                                 | 44 | 28 <sup>f</sup>                        | 15 | .65                                            | .21-2.04   | <b>3.69</b>                                                | <b>1.87-7.29</b> |
| Trouble with schoolwork/needs special classes                                 | 6                                        | 25 | 14                                                 | 22 | 27                                     | 15 | 1.32                                           | .40-4.40   | 1.47                                                       | .69-3.12         |
| Trouble in school or with police <sup>e</sup>                                 | 1                                        | 4  | 8                                                  | 13 | 7                                      | 4  | .35                                            | .04-3.31   | 2.09                                                       | .61-7.13         |
| Uses alcohol and/or drugs                                                     | 1                                        | 4  | 1                                                  | 2  | 1                                      | 1  | 12.57                                          | .19-839.78 | 7.79                                                       | .69-87.83        |
| ≥1 of problems above <sup>e</sup>                                             | 15                                       | 63 | 41                                                 | 65 | 87 <sup>f</sup>                        | 47 | 1.52                                           | .51-4.51   | <b>2.03</b>                                                | <b>1.11-3.73</b> |
| <b>Professional child has seen for emotional/mental problems</b>              |                                          |    |                                                    |    |                                        |    |                                                |            |                                                            |                  |
| Mental health professional <sup>e</sup>                                       | 6                                        | 25 | 14                                                 | 22 | 17 <sup>f</sup>                        | 9  | 1.72                                           | .50-5.99   | <b>2.85</b>                                                | <b>1.28-6.35</b> |
| Pediatrician/family doctor/other <sup>e</sup>                                 | 12                                       | 50 | 37                                                 | 59 | 75                                     | 40 | 1.01                                           | .36-2.84   | <b>2.04</b>                                                | <b>1.12-3.73</b> |
| <b>Interest in help for children among parents reporting ≥1 child problem</b> |                                          |    |                                                    |    |                                        |    |                                                |            |                                                            |                  |
| Worried about children and wants help                                         | 9                                        | 60 | 18                                                 | 44 | 31                                     | 36 | 1.96                                           | .65-5.95   | 1.74                                                       | .87-3.48         |
| Children need help for emotional problem or mental illness but not getting it | 5                                        | 33 | 8                                                  | 20 | 11                                     | 13 | 2.27                                           | .56-9.12   | 2.28                                                       | .87-5.94         |

<sup>a</sup> Number range is 23-24 due to missing data.

<sup>b</sup> Number range is 62-63 due to missing data.

<sup>c</sup>. Number range is 183-186 due to missing data.

<sup>d</sup> Odds ratios (OR) are adjusted for parental age and any anxiety disorder.

<sup>e</sup> Chi square comparisons across groups were significant at the  $p < .05$  level.

<sup>f</sup> Pairwise comparisons were conducted between the combined major/subthreshold depression groups and the no depression group and were significant at the  $p < .01$  level.
